# Supplementary material for: TXNRD1: A Key Regulator Involved in the Ferroptosis of CML Cells Induced by Cysteine Depletion In Vitro
Source: Hindawi journal article supplement (doi:10.1155/2021/7674565), 2021-01-01
Supplement: f1 [file 7674565.f1.pdf]

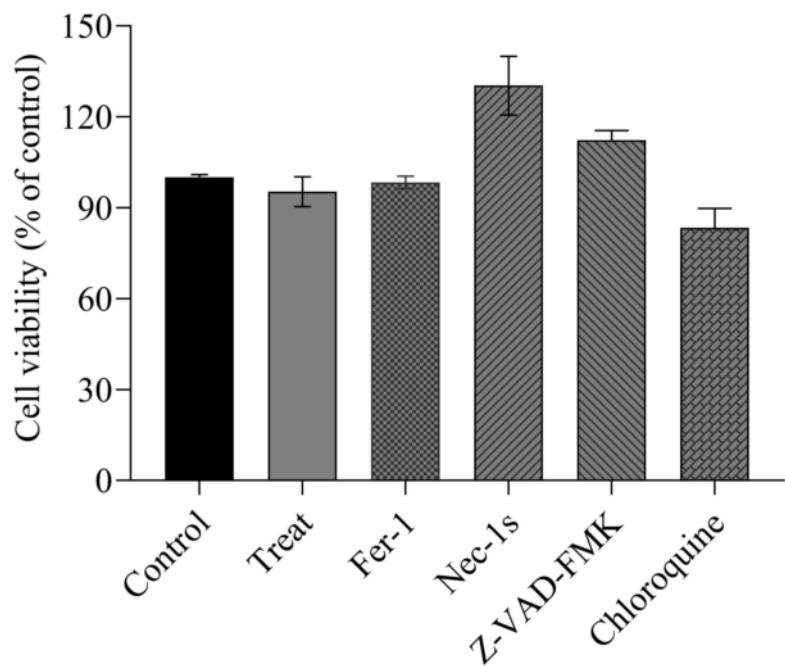

(a)

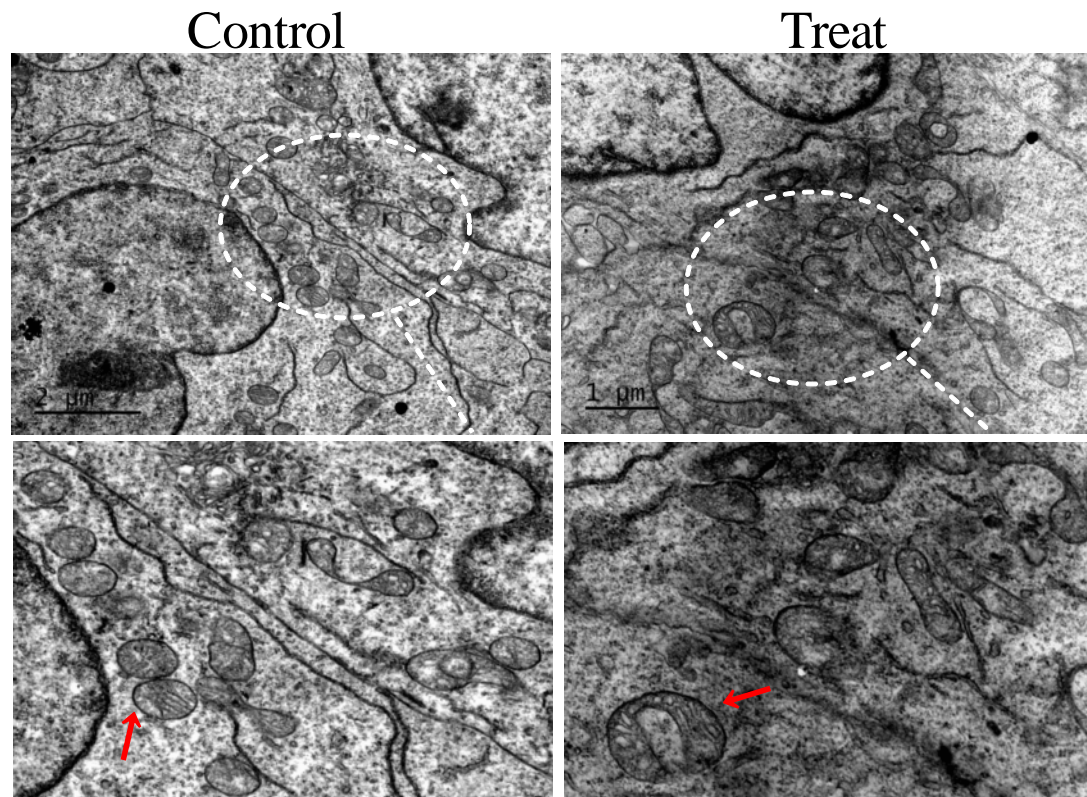

(b)

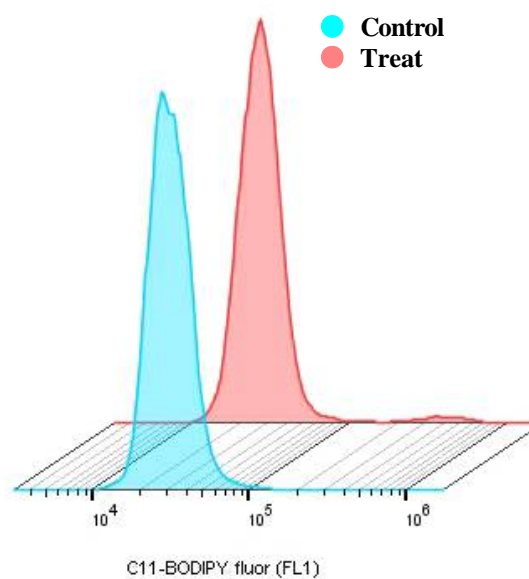

(c)

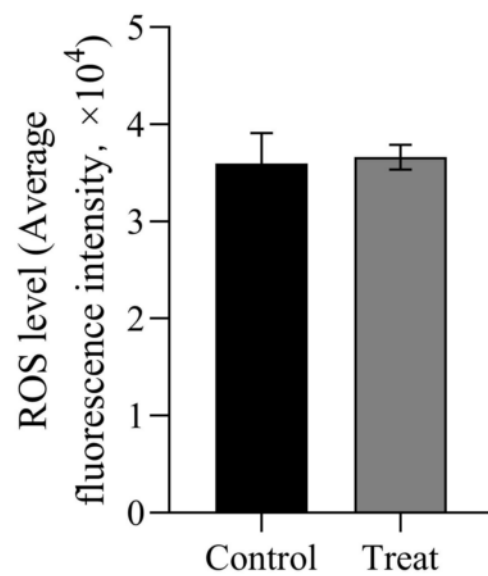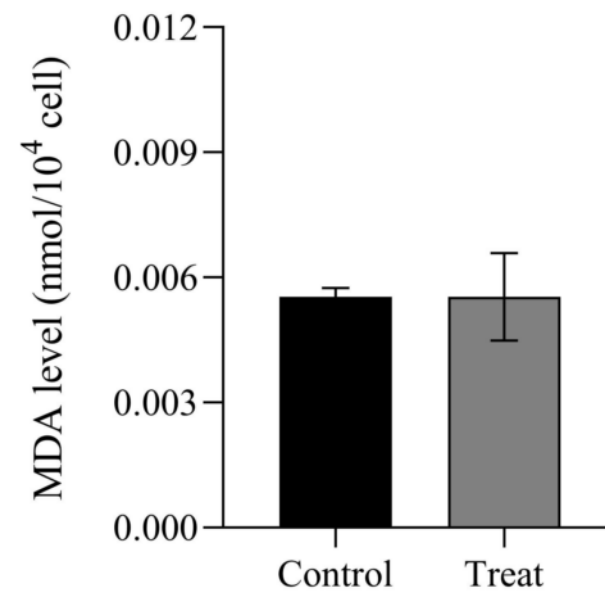

(d)
